# Supplementary material
Source: publisher site journal article supplement (https://www.dovepress.com/get_supplementary_file.php?f=298948.docx)
Supplement: Supplementary file 1 [file get_supplementary_file.php]

**APPENDIX A** Items of the FCV-19 Scale in English and Portuguese languages

| Item 1 – I am most afraid of the coronavirus  Item 1 – Eu estou com muito medo do coronavírus |
| --- |
| Item 2 – It makes me uncomfortable to think about coronavirus  Item 2 – Me sinto muito desconfortável em pensar no coronavírus |
| Item 3 – My hands become clammy when I think about coronavirus  Item 3 – Minhas mãos ficam suadas quando penso no coronavírus |
| Item 4 – I am afraid of losing my life because of coronavirus  Item 4 – Tenho medo de perder a minha vida por causa do coronavírus |
| Item 5 – I become nervous or anxious when watching news and stories about coronavirus  Item 5 – Quando assisto notícias sobre o coronavírus na mídia eu fico nervoso(a) ou ansioso(a) |
| Item 6 – I cannot sleep because I am worried about getting coronavirus  Item 6 – Não consigo dormir porque tenho a preocupação de contrair o coronavírus |
| Item 7 – My heart races or palpitates when I think about coronavirus  Item 7 – Meu coração acelera ou palpita quando eu penso que posso pegar o coronavírus |

Notes: Adapted from Ahorsu DK, Lin CY, Imani V, Saffari M, Griffiths MD, Pakpour AH. The Fear of COVID-19 Scale: Development and initial validation. *Int J Ment Health Addict*. 2020 [Epub ahead of print]. [Copyright](https://www.ncbi.nlm.nih.gov/pmc/about/copyright/) © Springer Science+Business Media, LLC, part of Springer Nature 2020.  Creative Commons Attribution 4.0 International License: <http://creativecommons.org/licenses/by/4.0/>.
